# Supplementary material for: Poxviruses Bearing DNA Polymerase Mutations Show Complex Patterns of Cross-Resistance
Source: MDPI journal article supplement (doi:10.3390/biomedicines10030580), 2022-03-01
Supplement: s1 [file s1]

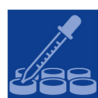

**Figure S1.** Annealing of primers used for the amplification of the E9L gene. The numbers indicate the nucleotide position in the VACV genome. In brown is highlighted the nucleotide sequencing encoding the DNA polymerase. Forward (in green) and reverse (in yellow) primers used for PCR amplification are as well highlighted.

```
53581 tctaattgact taactgaatc taacaaagag cgaactacaa ctgttgtaaa ttattttatg
53641 cttcgtaaaa tgtagggtttt gaaccaaaca ttctttcaaa gaatgagatg cataaaaactt
53701 tattatccaa tagattgact atttcggacg tcaatcgttt aaagtaaact tcgtaaaata
53761 ttctttgatc actgcogagt ttaaaacttc tatcgataat tgtttcatat gttttaatat
53821 ttacaagttt tttggtccat ggtacattag cgggacaaat atatgcaaaa taatatcggt
53881 ctccaagttc tatagttttc ggattatttt tattatatcc agtaaccaaa tacatattag
53941 ggttatctgc ggattttataa tttgagtgat gcattcgact caacataaat aattctagag
54001 gagacgatct actatcaaat tcggatcgta aatctgtttc taaagaacgg agaatatcta
54061 tacatacctg attagaatto atccgtcctt cagacaacat ctcagacagt ctggtcttgt
54121 atgtcttaat catattctta tgaaacttgg aaacatctct tctagtttca ctagtacctt
54181 tattaattct ctcagggtaca gattttgaat tcgacgatgc cgagtatttc atcgttgtat
54241 atttctttct cgattgcata atcagattct tatataccgc ctcaaaactc attttaaaaa
54301 tattaacaaa tactctatta ttaactagtc gttctaactc ctttgctatt tctatggact
54361 tatctacatc ttgactgtct atctctgtaa acacggagtc ggtatctcca tacacgctac
54421 gaaaacgaaa tctgtaattc ataggcaacg atgttttcac aatcggatta atatctctat
54481 cgtccatata aaatggatta cttaatggat tggcaaacgg taacataccg ttagataact
54541 ctgctccatt tagtaccgat tctagatata agatcattct acgtcctatg gatgtgcaac
54601 tcttagccga agcgtatgag tatagagcac tattttctaaa tcccatcaga ccatatactg
54661 agttggctac tatcttgtac gtatattgca tggaaacata gatggccttt tcagttgaac
54721 tggtagcctg ttttaacatc tttttatata tggctctctc tgccaaaaat gttcttaata
54781 gtctaggaat ggttctctct atcgatctat cgaaaattgc tatttcagag atgaggttcg
54841 gtagtctagg ttcaaatga accgtaatat atctaggagg tggatatttc tgaagcaaga
54901 gctgattatt tatttcttct tccaatctat tggactaac aacgacaccg actaatgttt
54961 cgggagatag atttccaaag atacacacat taggatacag actgttataa tcaaagatta
55021 atacattatt actaaacatt ttttgtttgc gagcaaatac cttaacgctt ctataaggaa
55081 acttttgttt tgtttctgat ctaactaaga tagttttagt ttccaacaat agctttaaca
55141 gtggaccctt gatgactgta ctgcctctat attcgaatac catggattga ggaagcacat
55201 atgttgacgc accgcgctct gtttttgttt ctactccata atactcccac aaatactgac
55261 acaacaagc atcatgaata cagtatctag ccatacttaa agctatgttt agattataat
55321 ccttatacat ctgagctaaa tcaacgctat cctttccgaa agataattta tatgtatcat
55381 taggtaaagt aggataaat tcaacgactt taaatccatt ttcccaaata tctttacgaa
55441 ttactttaca tataatatcc tcatcaacag tcacataatt acctgtggtt aaaacctttg
55501 caaatgcgc ggccttgctt ttgcgctcgc tagtatcgtc accgatgaac gtcatttctc
55561 taactcctct atttaatact ttacccatgc aactgaacgc gttcttggtt atagaatcca
55621 atttgtagca atccaatttt tcagattttt gaatgaatga atatagatcg aaaaatatag
55681 ttccattatt gttatttaac tgaaacgtag tattggccat gccgcctact ccttatgac
55741 tagactgatt tctctcataa atacagagat gtacagcttc ctttttgctc ggagatctaa
55801 agataatctt ctctcctggt aataactcta gacgattagt aatatactc agatcaaagt
55861 tatgtccgtt aaaggtaacg acatagtcga acgttagttc caacaattgt ttagctatc
55921 gtaacaaaac tatttcagaa cataaaacta gttctcgttc gtaatccatt tccattagtg
55981 actgtatcct caaacatcct ctatcgacgg cttcttggtt ttctgttcc gttaacatct
56041 cttcattaat gagcgtaaac aataatcggt taccacttaa atcgatataa cagtaacttg
56101 tatgcgagat tgggttaata aatacagaag gaaacttctt atcgaagtga cactctatat
56161 ctagaaaata gtacgatctt gggatatcga atctagggtt ttttttagcg aaacagttac
56221 gtggatcgtc acaatgataa catccattgt taatotttgt caaatattgc tcgtccaacg
56281 agtaacatcc gtctggagat atcccgtagt aaatataaaa ccaactaata ttgagaaatt
56341 catccatggt ggcattttgt atgtgcgtt tctttggctc ttctatcaac cacatatctg
56401 cgacggagca ttttctatct ttaatatcta gattataact tattgtctcg tcaatgtcta
56461 tagttctcat ctttcccaac ggcctcgcat taaatggagg aggagacaat gactgatata
56521 tttcgtccgt cactacgtaa taaaagtaat gaggaaatcg tataaatacg gtctcaccat
56581 ttcgacatct ggatttcaga tataaaaaatc tgttttcacc gtgactttca aaccaattaa
56641 tgcaccgaac atccatttat agaatttga aatataatct catttaaatg aatcccaaac
56701 attggggaag agccgtatgg accattattt ttatagtaact ttcgcaacgc ggtttagacg
```

The sets of primers used for amplification were:

Primer set 1: 5'-ATAATGGTCCATACGGCTCTTCCC-3' & 5'-TGGAGCAAATACCTTACCGCCTTC-3'

Primer set 2: 5-AGTCATCAAGGGTCCACTGTAAAGC-3' & 5-GATAAACTGAATCTAACAAAGAGCGACG-3'

**Figure S2.** Primers used for sequencing of the E9L gene.

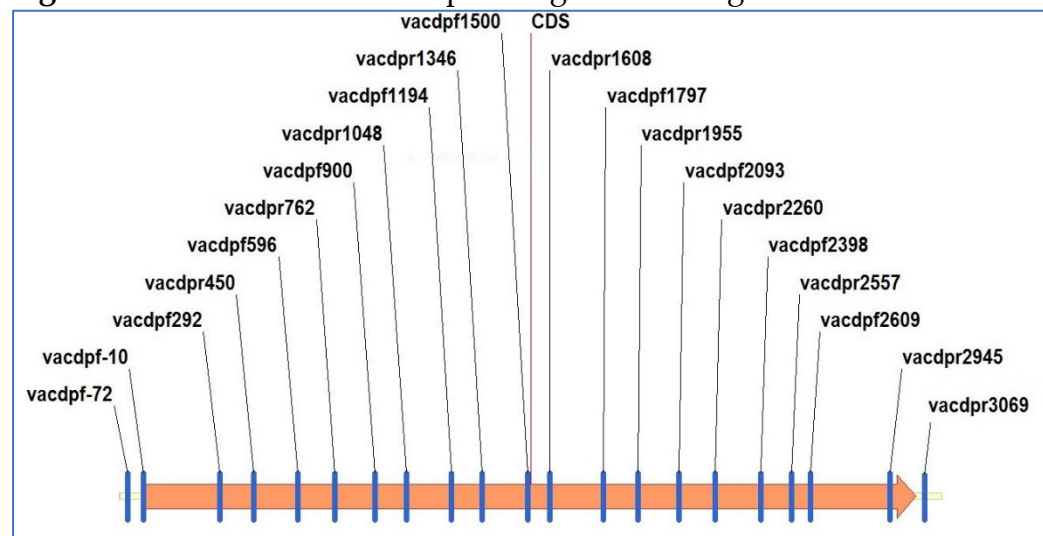

| Amplicon | Name       | Sequence (5' - 3')          |
|----------|------------|-----------------------------|
| VACDP_F  | vacdpf-72  | ataatggtccatacggctcttccc    |
|          | vacdpF-10  | aattctataaatggatgttcggtgc   |
|          | vacdpf292  | agcatacaaaatgccacatggatg    |
|          | vacdpf596  | tgtttacgctcattaatgaagagatg  |
|          | vacdpf900  | tgagagaaatcagctagtcataagg   |
|          | vacdpf1194 | tgaggatattatatgtaaagtaattcg |
|          | vacdpr450  | agcgaacagttacgtggatcgtcac   |
|          | vacdpr762  | tagttccaacaattgttagctattcg  |
|          | vacdpr1048 | atatagaatccaattgtacgaatcc   |
|          | vacdpr1346 | agattataatccttatacatctgagc  |
|          | vacdpr1608 | tggagcaaataccttaccgccttc    |
|          |            |                             |
| VACDP_R  | vacdpf1500 | agtcatacaagggtccactgttaaagc |
|          | vacdpf1797 | tcattgtgaacctagactaccgaacc  |
|          | vacdpf2093 | tagaatcggtactaaatggagcag    |
|          | vacdpf2398 | atgcaatcgaagaagaatatacaacg  |
|          | vacdpf2609 | gttctttagaaacagatttacgatcc  |
|          | vacdpr1955 | atggccttttcagttgaactggtag   |
|          | vacdpr2260 | agtcggtatctccatacagctacg    |
|          | vacdpr2557 | tctcagacagtctggtctgtatgtc   |
|          | vacdpR2945 | agattgactatttcggacgtcaatcg  |
|          | vacdpr3069 | gataaactgaatctaacaagagcgacg |
|          |            |                             |

**Figure S3.** (A) Genotyping (sequencing of the E9L gene, DNA polymerase) and phenotyping of viral clones derived from VACV VV1 emerging under pressure with HPMPC. (B) Drug-susceptibility profile of selected VV1 HPMPC-R viral clones to evaluate the impact of the R97H, A314T, and A684V mutations. Drug-resistance properties of the different viral clones were determined using a CPE reduction assay with HEL fibroblasts. The effects of different drugs on viruses encoding the indicated mutations were determined by calculating the EC<sub>50</sub> values for the parental wild-type strain and clones bearing the specific mutations. At least two independent experiments were performed for each test compound. Horizontal lines for each drug and mutant viral clones indicate the mean values ± standard deviation. The fold-resistance (ratio of the EC<sub>50</sub> for the mutant viruses to the EC<sub>50</sub> for the corresponding wild-type virus is marked at the top of the graph. VACV viral clones showing a ≥2-fold increase (red) were considered drug-resistant (R) and those with a ≤ 0.5-fold decrease (orange) were considered drug-hypersensitive (hs).

| Virus clones analyzed                   | DNA pol mutations |       |       |
|-----------------------------------------|-------------------|-------|-------|
| VV1 / HPMPC <sup>r</sup> clone 1        | R97H              | A314T | A684V |
| VV1 / HPMPC <sup>r</sup> clone 2        | R97H              | A314T | A684V |
| <b>VV1 / HPMPC<sup>r</sup> clone 3*</b> | R97H              | A314T | A684V |
| VV1 / HPMPC <sup>r</sup> clone 4        | R97H              | A314T | A684V |
| VV1 / HPMPC <sup>r</sup> clone 5        | R97H              | A314T | A684V |

A

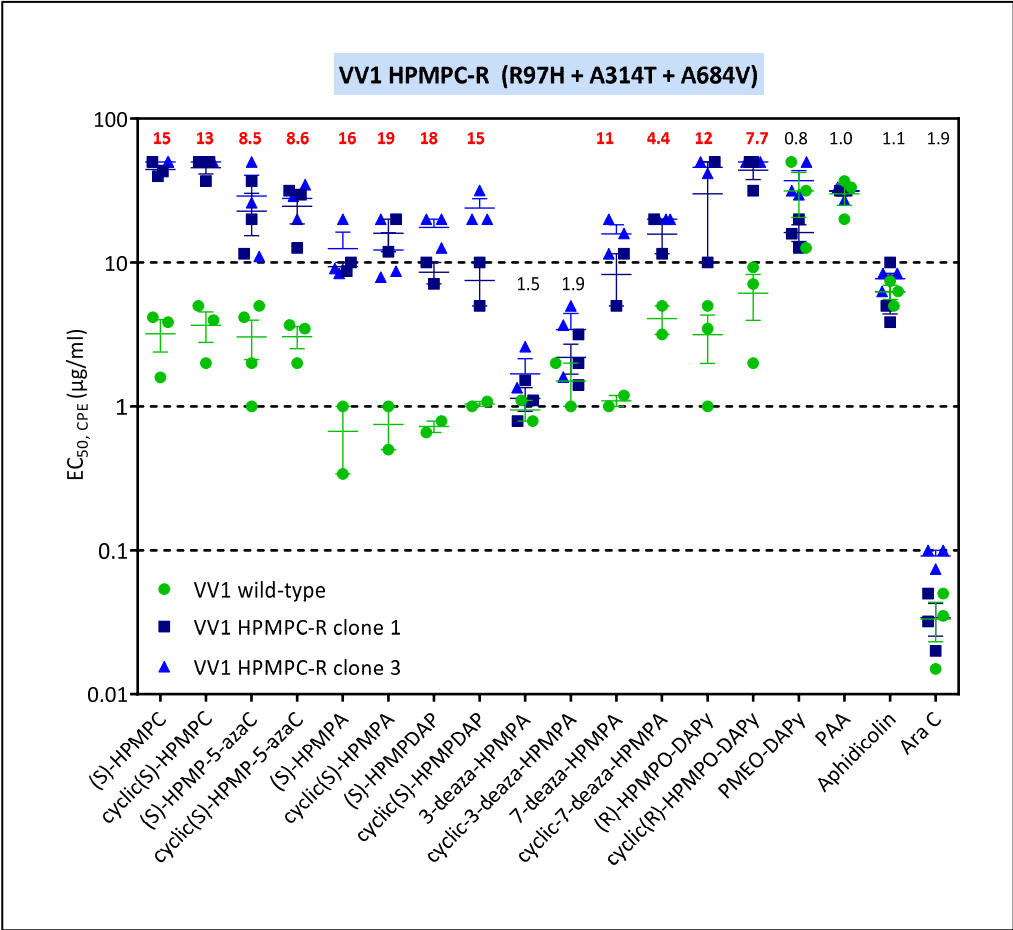

B

**Figure S4.** Diagram of poxvirus DNA polymerase with previously described mutations known to be associated with altered drug-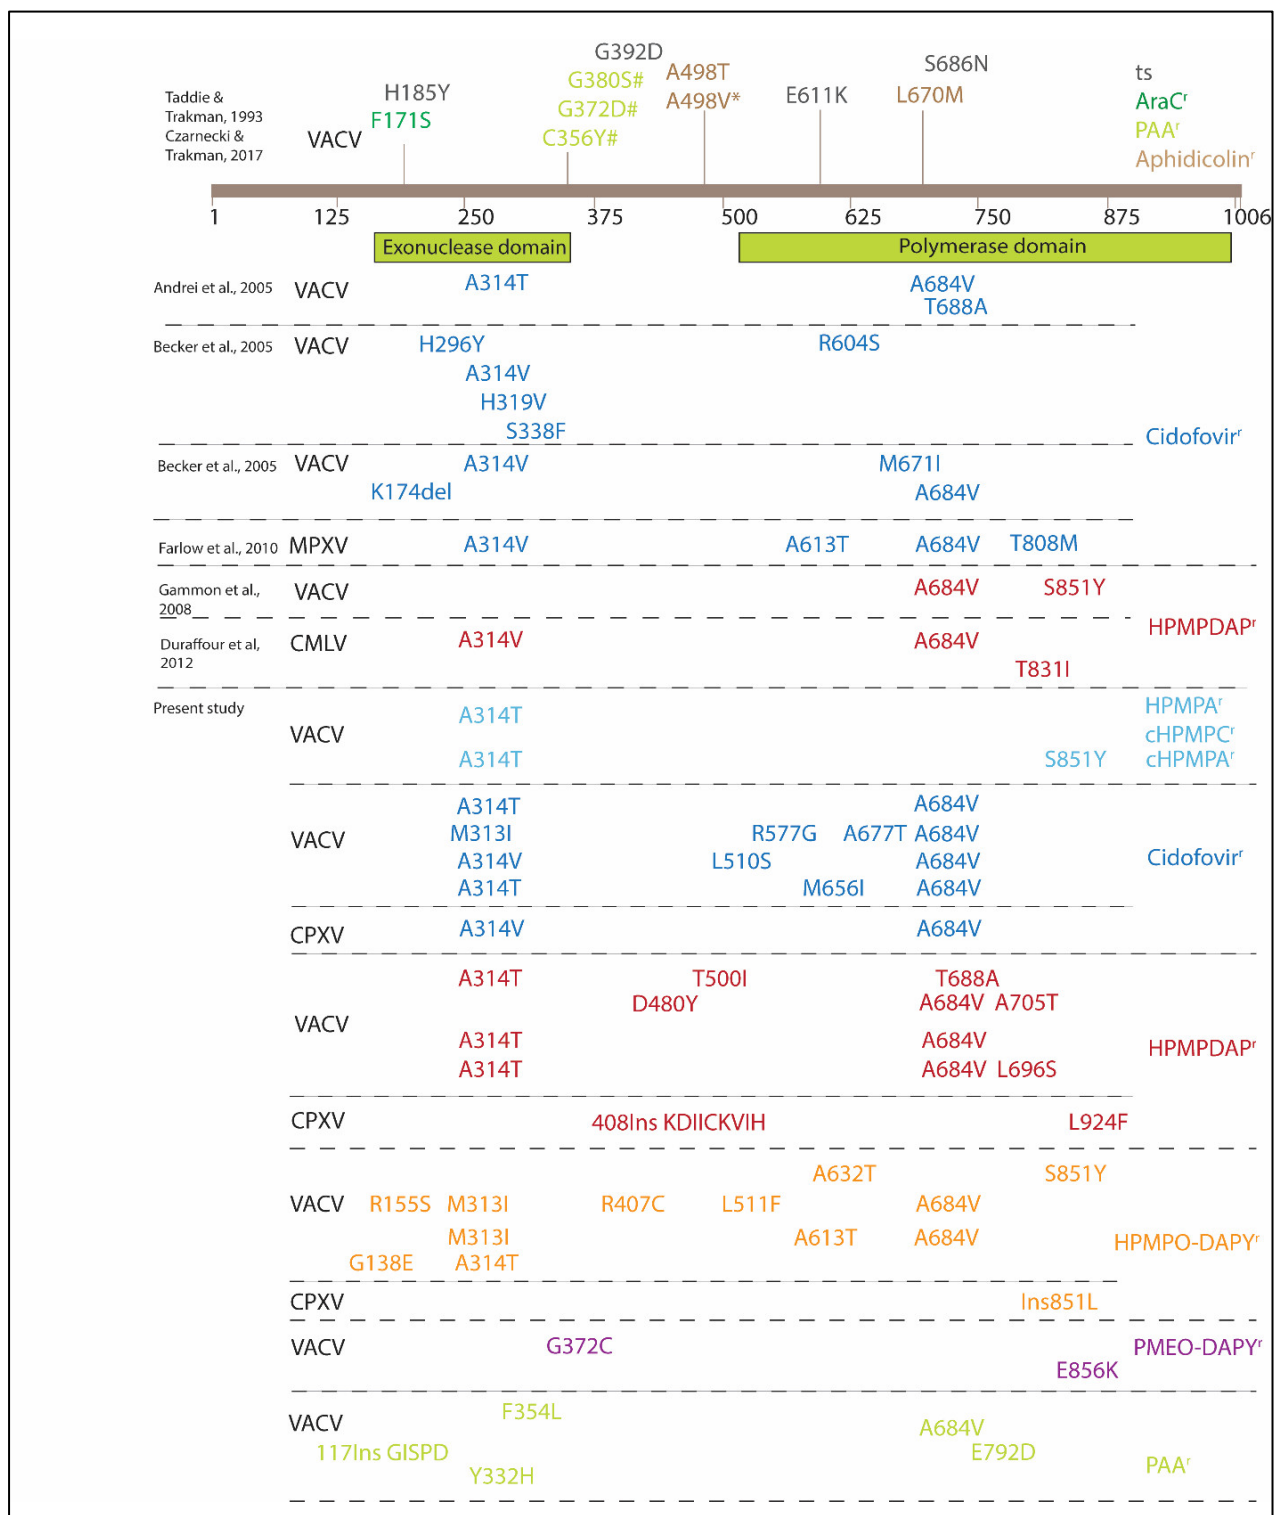

susceptibility and mutations reported in the present study.

**Table S1.** Starting and ending drug concentrations used for the drug escalations

| Drug                   | Starting concentration (µg/ml) | End concentration (µg/ml) |
|------------------------|--------------------------------|---------------------------|
| Cidofovir (HPMPC)      | 1                              | 50                        |
| cHPMPC                 | 1                              | 50                        |
| HPMPA                  | 0.2                            | 30                        |
| cHPMPA                 | 0.2                            | 4                         |
| HPMPDAP                | 1                              | 50                        |
| HPMPO-DAP <sub>γ</sub> | 1                              | 50                        |
| PMEO-DAP <sub>γ</sub>  | 20                             | 200                       |
| PAA                    | 20                             | 150                       |

**Table S2.** Genotyping (sequencing of the E9L gene, DNA polymerase) of viral clones derived from VACV VV2 emerging under pressure with HPMPC.

| Virus clones analyzed             | DNA pol mutations |       |       |       |       |
|-----------------------------------|-------------------|-------|-------|-------|-------|
| VV2 / HPMPC <sup>r</sup> clone 1  | W8C               | M313I | R577G | A677  | A684V |
| VV2 / HPMPC <sup>r</sup> clone 2* | W8C               | M313I | R577G | A677T | A684V |
| VV2 / HPMPC <sup>r</sup> clone 3  | W8C               | M313I | R577G | A677  | A684V |
| VV2 / HPMPC <sup>r</sup> clone 4  | W8C               | M313I | R577G | A677T | A684V |
| VV2 / HPMPC <sup>r</sup> clone 5  | W8C               | M313I | R577G | A677  | A684V |

**Table S3.** Genotyping (sequencing of the E9L gene, DNA polymerase) of viral clones derived from VACV VV11 emerging under pressure with HPMPC.

| Virus clones analyzed              | DNA pol mutations |       |       |       |       |       |
|------------------------------------|-------------------|-------|-------|-------|-------|-------|
| VV11 / HPMPC <sup>r</sup> clone 1* | L90S              | R234L | A314T | M656I | A684V | S898T |
| VV11 / HPMPC <sup>r</sup> clone 2  | L90S              | R234  | A314T | M656I | A684V | S898T |
| VV11 / HPMPC <sup>r</sup> clone 3  | L90               | R234  | A314T | M656I | A684V | S898  |
| VV11 / HPMPC <sup>r</sup> clone 4  | L90               | R234  | A314T | M656I | A684V | S898  |
| VV11 / HPMPC <sup>r</sup> clone 5  | L90               | R234  | A314T | M656I | A684V | S898  |
| VV11 / HPMPC <sup>r</sup> clone 6  | L90S              | R234  | A314T | M656I | A684V | S898T |
| VV11 / HPMPC <sup>r</sup> clone 7  | L90               | R234  | A314T | M656I | A684V | S898T |

**Table S4.** Summary of the known and new DNA polymerase mutations in poxviruses associated with altered drug-sensitivity and their putative mode of action

| E9L mutation                                | Virus | Selected under pressure of: | Sensitivity / Hypersensitivity (hs) / resistance |                                  |                                                    | Putative mechanism                                                                                                    |
|---------------------------------------------|-------|-----------------------------|--------------------------------------------------|----------------------------------|----------------------------------------------------|-----------------------------------------------------------------------------------------------------------------------|
|                                             |       |                             | HPMP's & HPMP-DApy's                             | 3-deaza-HPMPA<br>HPMP-5-azaC     | PMEO-DApy,<br>PAA, aphidicolin<br>& AraC           |                                                                                                                       |
| <b>F171S (44)*</b>                          | VACV  | AraC                        | Not available                                    | Not available                    | AraC-R<br>AraA-R<br>Aphidicolin-hs                 | <b>F171S</b> (3'-5' exonuclease domain, Exo-I): modifying the 3' nucleotide binding at the exonuclease site (45)      |
| <b>K174 del (39)</b>                        | VACV  | Cidofovir (HPMPC)           | HPMPC-R - no data available for other ANPs       | Not available                    | Not available                                      | <b>K174 del</b> (3'-5' exonuclease domain): modifying the 3' nucleotide binding at the exonuclease site (45)          |
| <b>H185T (45, 52)</b>                       | VACV  | <i>ts</i>                   | Not available                                    | Not available                    | Not available                                      | <b>H185T</b> (3'-5' exonuclease domain): Destabilisation of the 3'-5' exonuclease domain (45)                         |
| <b><u>M313I</u></b>                         | VACV  | HPMPC<br>HPMPO-DApy         | Low resistance                                   | HPMP-5-azaC-S<br>3-deaza-HPMPA-S | PMEO-DApy-hs<br>PAA-hs<br>Aphidicolin-S<br>AraC-S  | <b>M313I</b> : (3'-5' exonuclease domain, beta-hairpin): Modulation of guidance from elongation to editing mode       |
| <b><u>M313I + A613T</u></b>                 | VACV  | HPMPO-DApy                  | Higher resistance than M313I                     | HPMP-5-azaC-R<br>3-deaza-HPMPA-S | PMEO-DApy-hs<br>PAA-hs<br>Aphidicolin-S<br>AraC-S  | <b>A613T</b> (polymerase domain): Destabilization of insert 3 or of the elongation site                               |
| <b><u>M313I + A613T + A684V</u></b>         | VACV  | HPMPO-DApy                  | Higher resistance than M313I                     | HPMP-5-azaC-R<br>3-deaza-HPMPA-R | PMEO-DApy-R<br>PAA-S<br>Aphidicolin-S<br>AraC-R    | <b>A684V</b> (polymerase domain): indirect effect on the binding of the template backbone in the elongation site (45) |
| <b><u>M313I + R577G + A684V</u></b>         | VACV  | HPMPC                       | Higher resistance than M313I                     | HPMP-5-azaC-R<br>3-deaza-HPMPA-S | PMEO-DApy-hs<br>PAA-S<br>Aphidicolin-hs<br>AraC-hs | <b>R577G</b> (polymerase domain) catalytic impairment of the enzyme                                                   |
| <b><u>M313I + R577G + A677T + A684V</u></b> | VACV  | HPMPC                       | Higher resistance than M313I + R577G + A684V     | HPMP-5-azaC-R<br>3-deaza-HPMPA-S | PMEO-DApy-hs<br>PAA-S<br>Aphidicolin-S<br>AraC-hs  | <b>A677T</b> (polymerase domain): catalytic impairment of the enzyme                                                  |

|                                     |                              |                                                   |                                      |                                  |                                                    |                                                                                                                 |
|-------------------------------------|------------------------------|---------------------------------------------------|--------------------------------------|----------------------------------|----------------------------------------------------|-----------------------------------------------------------------------------------------------------------------|
| <b><u>A314T</u></b> (37-42, 45)     | VACV<br>CMLV<br>MPXV<br>CPXV | HPMPC<br>cHPMPC<br>HPMPA<br>HPMPDAP<br>HPMPO-DAPy | Higher resistance than A314V         | HPMP-5-azaC-R<br>3-deaza-HPMPA-R | PMEO-DAPy-hs<br>PAA-hs<br>Aphidicolin-S<br>AraC-S  | A314T (3'-5' exonuclease domain, beta-hair-pin): modulation of guidance from elongation to editing mode (45)    |
| <b><u>A314V</u></b> (37-42, 45)     | VACV<br>CMLV<br>MPXV<br>CPXV | HPMPC<br>HPMPDAP                                  | Low resistance                       | HPMP-5-azaC-S<br>3-deaza-HPMPA-S | PMEO-DAPy-hs<br>PAA-hs<br>Aph-hs<br>AraC-hs        |                                                                                                                 |
| <b><u>A314T + A684V</u></b> (37)    | VACV                         | HPMPC<br>HPMPDAP                                  | ~ resistance as A314T                | HPMP-5-azaC-R<br>3-deaza-HPMPA-S | PMEO-DAPy-S<br>PAA-S<br>Aphidicolin-S<br>AraC-S    | Combination of mutations                                                                                        |
| <b><u>A314T + L696S</u></b>         | VACV                         | HPMPDAP                                           | ~ resistance as A314T                | HPMP-5-azaC-R<br>3-deaza-HPMPA-S | PMEO-DAPy-hs<br>PAA-hs<br>Aphidicolin-S<br>AraC-S  | Combination of mutations<br><b>L696S</b> (polymerase domain): catalytic impairment of the enzyme                |
| <b><u>A314T + A684V + L696S</u></b> | VACV                         | HPMPDAP                                           | Higher resistance than A314T + L696S | HPMP-5-azaC-R<br>3-deaza-HPMPA-R | PMEO-DAPy-R<br>PAA-S<br>Aphidicolin-S<br>AraC-S    | Combination of mutations                                                                                        |
| <b><u>A314T + M656I + A684V</u></b> | VACV                         | HPMPC                                             | Higher resistance than A314T + A684V | HPMP-5-azaC-R<br>3-deaza-HPMPA-S | PMEO-DAPy-hs<br>PAA-hs<br>Aphidicolin-S<br>AraC-hs | Combination of mutations<br><b>M656I</b> (polymerase domain):                                                   |
| <b>A314T + T688A</b> (37)           | VCAV                         | HPMPC                                             | Resistance to ANPs                   | HPMP-5-azaC-R<br>3-deaza-HPMPA-S | PMEO-DAPy-hs<br>PAA-hs<br>AraC-hs<br>Aphidicolin-S | Combination of mutations<br><b>T688A</b> (polymerase domain): indirect effect on template backbone binding (45) |
| <b><u>A314V + T500I</u></b>         | VACV                         | HPMPDAP                                           | ~ A314V                              | HPMP-5-azaC-S<br>3-deaza-HPMPA-S | PMEO-DAPy-hs<br>PAA-hs<br>AraC-hs<br>Aph-hs        | Combination of mutations<br><b>T500I</b> : changes in enzyme structure                                          |
| <b><u>A314V + T500I + T688A</u></b> | VACV                         | HPMPDAP                                           | Higher resistance than A314V         | HPMP-5-azaC-R<br>3-deaza-HPMPA-S | PMEO-DAPy-hs<br>PAA-hs<br>AraC-hs<br>Aph-hs        | Combination of mutations                                                                                        |

|                                                               |      |            |                                            |                                  |                                                     |                                                                                                                                                          |
|---------------------------------------------------------------|------|------------|--------------------------------------------|----------------------------------|-----------------------------------------------------|----------------------------------------------------------------------------------------------------------------------------------------------------------|
| <b><u>A314V + A684V</u></b>                                   | VACV | HPMPC      | Higher resistance than A314V               | HPMP-5-azaC-R<br>3-deaza-HPMPA-S | PMEO-DAPy-hs<br>PAA-hs<br>AraC-hs<br>Aphidicolin-hs | Combination of mutations                                                                                                                                 |
| <b><u>A314V + L510S + A684V</u></b>                           | VACV | HPMPC      | Higher resistance than A314V + A684V       | HPMP-5-azaC-R<br>3-deaza-HPMPA-S | PMEO-DAPy-hs<br>PAA-hs<br>AraC-hs<br>Aph-hs         | <b>L510S</b> (N-terminal domain): changes in enzyme structure                                                                                            |
| <b><u>Y332H</u></b>                                           | VACV | PAA        | Sensitive                                  | HPMP-5-azaC-S<br>3-deaza-HPMPA-S | PMEO-DAPy-S<br>PAA-R<br>Aphidicolin-S<br>AraC-S     | <b>Y332H</b> (3'-5' exonuclease domain): Destabilization of the 3'-5' exonuclease domain                                                                 |
| <b>S338F (40)</b>                                             | VACV | HPMPC      | HPMPC-R - no data available for other ANPs | Not available                    | Not available                                       | <b>S338F</b> (3'-5' exonuclease domain): indirect effect on complementary strand binding or on strand switching between elongation and editing mode (45) |
| <b><u>F354L</u></b>                                           | VACV | PAA        | Sensitive                                  | HPMP-5-azaC-S<br>3-deaza-HPMPA-R | PMEO-DAPy-R<br>PAA-R<br>Aphidicolin-hs<br>AraC-R    | <b>F354L</b> (DNA polymerase family B viral insert): altering the interaction between insert 2 and finger domain                                         |
| <b>C356T**<br/>G372D**<br/>G380S** (44)</b>                   | VACV | PAA        | Not available                              | Not available                    | PAA-R<br>Aphidicolin-hs<br>AraC-R +/-               | <b>C356T, G372D, G380S</b> : (DNA polymerase family B viral insert): altering the interaction between insert 2 and finger domain (45)                    |
| <b>F171S + C356T<br/>F171S + G372D<br/>F171S + G380S (44)</b> | VACV | -          | Not available                              | Not available                    | PAA-R<br>Aphidicolin-hs<br>AraC-R                   | Combination of mutations                                                                                                                                 |
| <b>G372C</b>                                                  | VACV | PMEO-DAPy  | Sensitive                                  | HPMP-5-azaC-S<br>3-deaza-HPMPA-R | PMEO-DAPy-R<br>PAA-S<br>Aphidicolin-S<br>AraC-R     | <b>G372C</b> : (DNA polymerase family B viral insert): altering the interaction between insert 2 and finger domain                                       |
| <b>G392D (44, 53)</b>                                         | VACV | ts         | Not available                              | Not available                    | Not available                                       | <b>G392D</b> : (DNA polymerase family B viral insert): destabilization of insert 2 (45)                                                                  |
| <b><u>R407C + L511F</u></b>                                   | VACV | HPMPO-DAPy | Low resistance                             | HPMP-5-azaC-S<br>3-deaza-HPMPA-S | PMEO-DAPy-S<br>PAA-S<br>Aphidicolin-S<br>AraC-S     | Combination of mutations<br><b>R407C</b> (changes in enzyme structure)<br><b>L511F</b> (changes in enzyme structure)                                     |

|                                                     |                              |                                       |                                              |                                  |                                                   |                                                                                                                                                     |
|-----------------------------------------------------|------------------------------|---------------------------------------|----------------------------------------------|----------------------------------|---------------------------------------------------|-----------------------------------------------------------------------------------------------------------------------------------------------------|
| <b><u>M313I + R407C + L511F</u></b>                 | VACV                         | HPMPO-DAPy                            | Higher resistance than R407C + L511F         | HPMP-5-azaC-S<br>3-deaza-HPMPA-S | PMEO-DAPy-S<br>PAA-hs<br>Aphidicolin-S<br>AraC-hs | Combination of mutations                                                                                                                            |
| <b><u>R155S + M313I + R407C + L511F + A684V</u></b> | VACV                         | HPMPO-DAPy                            | Higher resistance than M313I + R407C + L511F | HPMP-5-azaC-R<br>3-deaza-HPMPA-S | PMEO-DAPy-S<br>PAA-S<br>Aphidicolin-S<br>AraC-S   | Combination of mutations                                                                                                                            |
| <b><u>D480Y</u></b>                                 | VACV                         | HPMPDAP                               | Low resistance                               | HPMP-5-azaC-S<br>3-deaza-HPMPA-S | PMEO-DAPy-hs<br>PAA-S<br>Aphidicolin-S<br>AraC-hs | <b>D480Y</b> (3'-5' exonuclease domain): indirect effect on complementary strand binding or on strand switching between elongation and editing mode |
| <b><u>D480D + A684V + A705T</u></b>                 | VACV                         | HPMPDAP                               | Higher resistance than D480Y                 | 3-deaza-HPMPA-S<br>HPMP-5-azaC-R | PMEO-DAPy-S<br>PAA-R<br>Aphidicolin-hs<br>AraC-hs | Combination of mutations<br><b>A705T</b> (palm domain): impaired catalytic activity                                                                 |
| A498T<br>A498V* (44)                                | VACV                         | Aphidicolin                           | Not available                                | Not available                    | PAA-hs<br>Aphidicolin-R<br>AraC-hs & AraA-hs      | <b>E498T/V</b> : Interference with the rotation of a base in the template required for aphidicolin binding (45)                                     |
| E611K (44)                                          | VACV                         | <i>ts</i>                             | Not available                                | Not available                    | Not available                                     | <b>E611K</b> : Destabilization of insert 3 or of the elongation site (45)                                                                           |
| L670M (44)                                          | VACV                         | Aphidicolin                           | Not available                                | Not available                    | Aphidicolin-R                                     | <b>L670M</b> : Indirect effect on the binding of the template backbone next to the aphidicolin-binding site (45)                                    |
| <b><u>A684V (37, 39, 41, 42)</u></b>                | VACV<br>CMLV<br>CPXV<br>MPXV | HPMPC<br>HPMPDAP<br>HPMPO-DAPy<br>PAA | Low resistance                               | HPMP-5-azaC-R<br>3-deaza-HPMPA-S | PMEO-DAPy-R<br>PAA-R<br>Aphidicolin-hs<br>AraC-S  | <b>A684V</b> : Indirect effect on the binding of the template backbone in the elongation site (45)                                                  |
| <b><u>S686N</u></b>                                 | VACV                         | <i>ts</i>                             | Not available                                | Not available                    | Not available                                     | <b>S686N</b> : Destabilization of insert 3 or the elongation site (45)                                                                              |

|                                   |      |                                 |                              |                                               |                                                                             |                                                                                                                                                                                                                                                                                                         |
|-----------------------------------|------|---------------------------------|------------------------------|-----------------------------------------------|-----------------------------------------------------------------------------|---------------------------------------------------------------------------------------------------------------------------------------------------------------------------------------------------------------------------------------------------------------------------------------------------------|
| <b><u>117Ins GSPD + E792D</u></b> | VACV | PAA                             | Sensitive                    | HPMP-5-azaC-S 3-deaza-HPMPA-S                 | PMEO-DAPy-R<br>PAA-R<br>Aphidicolin-hs<br>AraC-S                            | Combination of mutations<br><b>117Ins GSPD</b> : (3'-5' exonuclease domain): modifying the 3' nucleotide binding at the exonuclease site<br><b>E792D</b> : Modulation of domain movements by a modification at the thumb-palm domain connection and a changed interaction with the complementary strand |
| <b><u>T831I</u></b>               | VACV | HPMPDAP                         | High resistance              | HPMP-5-azaC-R<br>3-deaza-HPMPA-S              | PMEO-DAPy-hs<br>PAA-hs<br>Aphidicolin: not available<br>AraC: not available | <b>T831I</b> : Modulation of domain movements by a modification at the thumb-palm domain connection and a changed interaction with the complementary strand (45)                                                                                                                                        |
| <b><u>S851Y (41)</u></b>          | VACV | HPMPDAP<br>HPMPO-DAPy<br>cHPMPA | Low resistance               | HPMP-5-azaC-S<br>3-deaza-HPMPA-hs             | PMEO-DAPy-hs<br>PAA-hs<br>Aphidicolin-S<br>AraC-hs                          | <b>S851Y</b> : Modulation of domain movements by a modification of the thumb-palm domain interface (45)                                                                                                                                                                                                 |
| <b><u>S851Y + A353V</u></b>       | VACV | cHPMPA                          | Higher resistance than S851Y | HPMP-5-azaC: not available<br>3-deaza-HPMPA-S | PMEO-DAPy-hs<br>PAA-hs<br>Aphidicolin-S<br>AraC-hs                          | <b>A353V</b> : (DNA polymerase family B viral insert): altering the interaction between insert 2 and finger domain                                                                                                                                                                                      |
| <b><u>S851Y + A632T</u></b>       | VACV | HPMPO-DAPy                      | Higher resistance than S851Y | HPMP-5-azaC-R<br>3-deaza-HPMPA-S              | PMEO-DAPy-hs<br>PAA-hs<br>Aphidicolin-S<br>AraC-S                           | Combination of mutations<br><b>A632T</b> (polymerase domain): impaired catalytic activity                                                                                                                                                                                                               |
| <b><u>S851Y + A684V (41)</u></b>  | VACV | HPMPDAP                         | Higher resistance than S851Y | HPMP-5-azaC-R<br>3-deaza-HPMPA-R              | PMEO-DAPy-S<br>PAA-R<br>Aphidicolin-S<br>AraC-S                             | Combination of mutations                                                                                                                                                                                                                                                                                |
| <b><u>Ins851L</u></b>             | CPXV | HPMPO-DAPy                      | Higher resistance than S851Y | HPMP-5-azaC-R<br>3-deaza-HPMPA-S              | PMEO-DAPy-hs<br>PAA-hs<br>Aphidicolin-R<br>AraC-S                           | <b>S851Y</b> Modulation of domain movements by a modification of the thumb-palm domain interface (45)                                                                                                                                                                                                   |
| <b><u>E856K</u></b>               | VACV | PMEO-DAPy                       | Sensitive                    | HPMP-5-azaC-S<br>3-deaza-HPMPA-R              | PMEO-DAPy-R<br>PAA-S<br>Aphidicolin-S<br>AraC-R                             | <b>E856K</b> (polymerase domain): impaired catalytic activity                                                                                                                                                                                                                                           |

|                              |      |         |                 |                                  |                                                   |                                                                                                                   |
|------------------------------|------|---------|-----------------|----------------------------------|---------------------------------------------------|-------------------------------------------------------------------------------------------------------------------|
| <b><u>L924F</u></b>          | CPXV | HPMPDAP | High resistance | HPMP-5-azaC-R<br>3-deaza-HPMPA-R | PMEO-DAPy-hs<br>PAA-hs<br>Aphidicolin-S<br>AraC-S | <b>L924F</b> (polymerase domain): impaired catalytic activity and/or effect on 3'-5' exonuclease activity         |
| <b><u>L924F + Ins408</u></b> | CPXV | HPMPDAP | ~L924F          | 3-deaza-HPMPA-S<br>HPMP-5-azaC-R | PMEO-DAPy-hs<br>PAA-hs<br>Aphidicolin-S<br>AraC-S | <b>Ins408</b> (DNA polymerase family B viral insert): altering the interaction between insert 2 and finger domain |

Abreviations: ts (temperature sensitive), hs (hypersensitive), S (sensitive), R (resistance), NA: not available

\* Mutator phenotype

\*\* Antimutator
